# Supplementary material for: Phenylcarbazole and phosphine oxide/sulfide hybrids as host materials for blue phosphors: effectively tuning the charge injection property without influencing the triplet energy
Source: Royal Society of Chemistry journal article supplement (doi:10.1039/c2cp23418a), 2011-11-23
Supplement: c2cp23418a.pdf [file c2cp23418a.pdf]

# Electronic Supplementary Information

## Phenylcarbazole and Phosphine Oxide/Sulfide Hybrids as Host Materials for Blue Phosphors: Effectively Tuning the Charge Injection Property without Influencing the Triplet Energy

Jie Wu,<sup>a</sup> Yi Liao,<sup>\*b</sup> Shui-Xing Wu,<sup>a</sup> Hai-Bin Li,<sup>a</sup> and Zhong-Min Su<sup>\*a</sup>

<sup>a</sup> *Institute of Functional Material Chemistry, Faculty of Chemistry, Northeast Normal University, Changchun 130024, Jilin, People's Republic of China*

<sup>b</sup> *Department of Chemistry, Capital Normal University, Beijing 100048, People's Republic of China*

*E-mail addresses: liaoy271@nenu.edu.cn, zmsu@nenu.edu.cn*

*Phone: +86-431-85099108; Fax: 86-431-85684009*

## Figures and tables

**Fig. S1** The bond lengths of PhCBZ. The deviations in bond lengths and torsional angle  $\omega$  of PO-PhCBZs from the unsubstituted PhCBZ in the ground state ( $S_0$ ) and the lowest triplet state ( $T_1$ ). The torsional angle  $\omega$  is defined as an angle between the mean plane of carbazole moiety and the phenyl moiety (see front and side view).

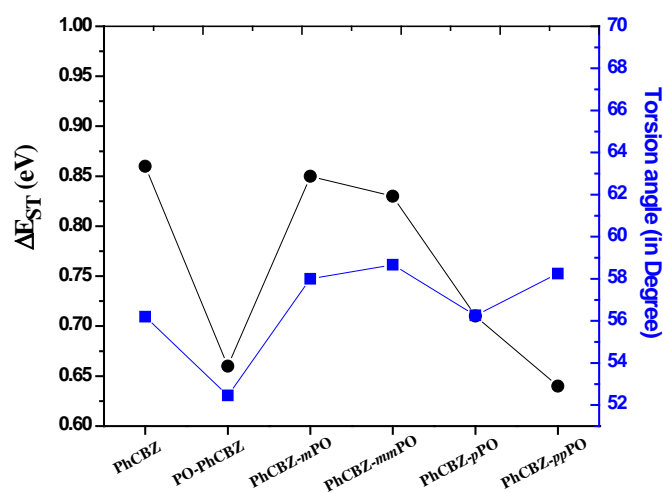

**Fig. S2** Evolutions of  $\Delta E_{ST}$  with respect to torsion angles  $\omega$  in representative systems.

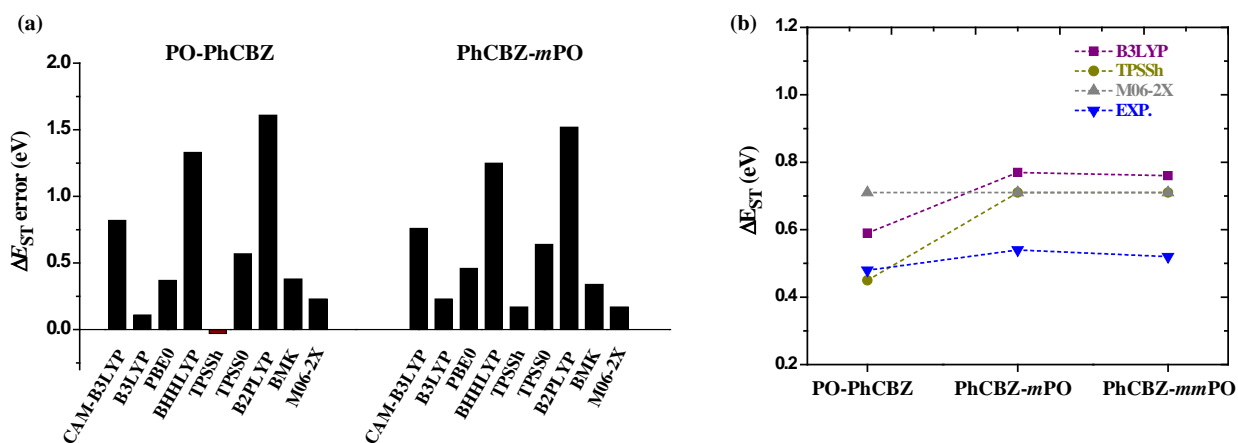

**Fig. S3** (a) Evolutions of the  $\Delta E_{ST}$  errors in PO-PhCBZ and PhCBZ-*m*PO for nine different functionals studied; the wine color represents the underestimated value (b) Evolutions of  $\Delta E_{ST}$  in PO-PhCBZ, PhCBZ-*m*PO, and PhCBZ-*mm*PO for four three functionals and the experiment values.

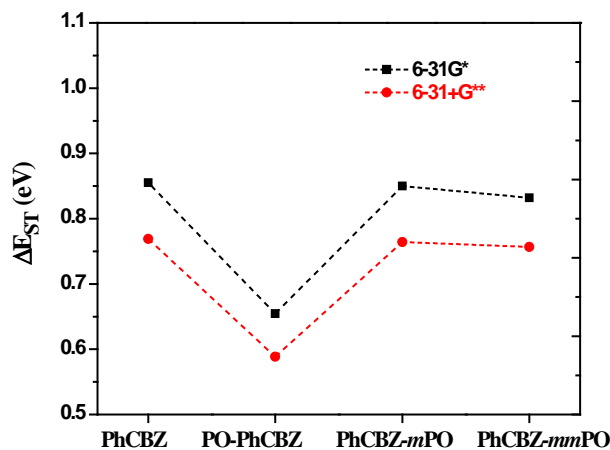

**Fig. S4** Evolution of  $\Delta E_{ST}$  in four systems for B3LYP functional with 6-31G\* and 6-31+G\*\* basis sets.

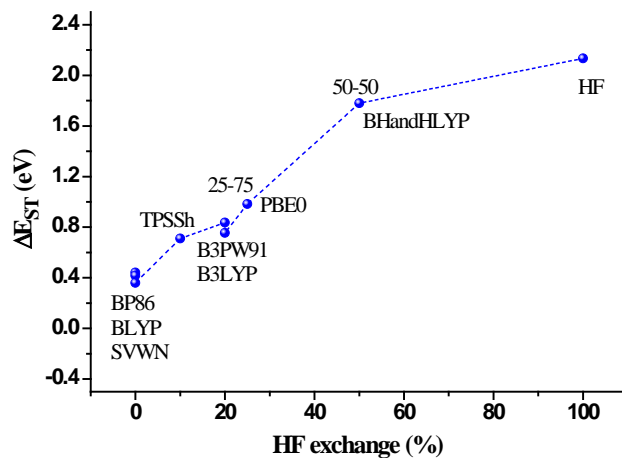

**Fig. S5** Evolution of  $\Delta E_{ST}$  for PhCBZ calculated using different density functionals.

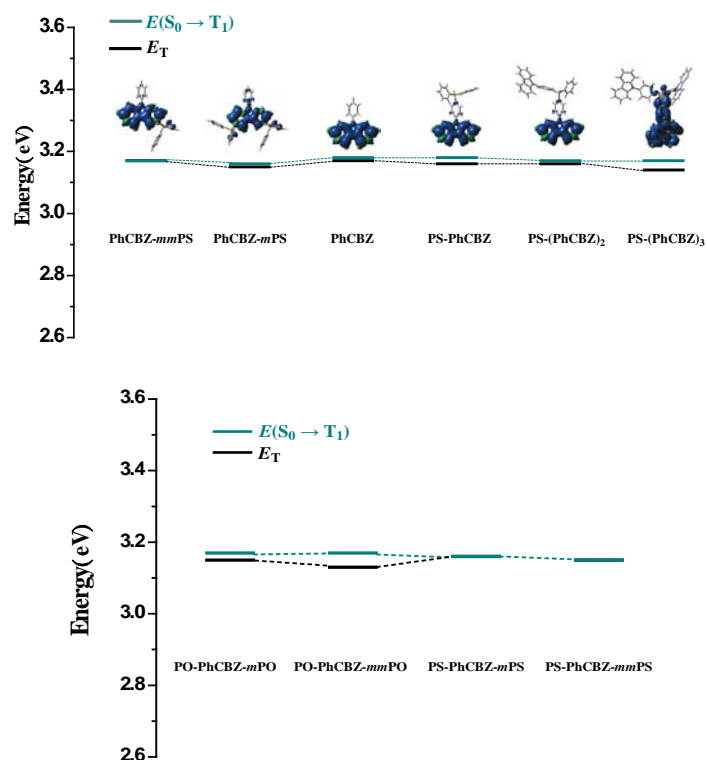

**Fig. S6** Spin density (SD) distribution, adiabatic triplet energies ( $E_T$ : the energy difference between  $T_1$  and  $S_0$  states) and vertical triplet energies ( $E(S_0 \rightarrow T_1)$ ): vertical excitation energy from  $S_0$  to  $T_1$ ) for PO(S)-PhCBZs.

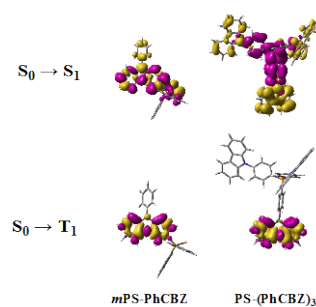

**Fig. S7** Change of electron density distribution upon the  $S_0 \rightarrow S_1$  and  $S_0 \rightarrow T_1$  electronic transition. Yellow and violet colors correspond to a decrease and increase of electron density, respectively.

**Table S1** Torsional angles ( $\omega$ ) of optimized geometries in the ground and triplet states

| Compounds | PhCBZ | PhCBZ- <i>m</i> PO | PhCBZ- <i>p</i> PO | PhCBZ- <i>mm</i> PO | PhCBZ- <i>pp</i> PO | PO-PhCBZ |       |
|-----------|-------|--------------------|--------------------|---------------------|---------------------|----------|-------|
| $\omega$  | $S_0$ | 56.2               | 58.00              | 56.26               | 58.67               | 58.25    | 52.46 |
|           | $T_1$ | 53.6               | 55.70              | 53.25               | 56.23               | 54.07    | 49.34 |

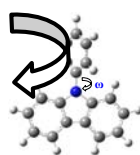

The torsional angle  $\omega$  is defined as an angle between the mean plane of carbazole moiety and the phenyl moiety (see front and side view).

**Table S2** Calculated HOMO and LUMO energies, HOMO-LUMO energy gaps  $E(H-L)$ , vertical excitation energies, and triplet energies (energy unit in eV) of PO(S)-PhCBZs

| Compounds               | HOMO  | LUMO  | $E(H-L)$ | $E(S_0 \rightarrow S_1)$ | $E(S_0 \rightarrow T_1)$ | $\Delta E_{ST}$ | $E_{T(Cal.)}$ | $E_{T(Exp.)}$ |
|-------------------------|-------|-------|----------|--------------------------|--------------------------|-----------------|---------------|---------------|
| PO-PhCBZ- <i>m</i> PO   | -5.68 | -1.15 | 4.53     | 3.91                     | 3.17                     | 0.74            | 3.15          | 3.01          |
| PO-PhCBZ- <i>mm</i> PO  | -5.82 | -1.24 | 4.58     | 3.96                     | 3.17                     | 0.79            | 3.13          | 3.07          |
| PO-PhCBZ- <i>p</i> PO   | -5.62 | -1.16 | 4.46     | 3.83                     | 3.11                     | 0.75            | 3.07          |               |
| PO-PhCBZ- <i>pp</i> PO  | -5.73 | -1.43 | 4.30     | 3.72                     | 3.06                     | 0.66            | 2.98          |               |
| PhCBZ- <i>m</i> PS      | -5.55 | -0.98 | 4.57     | 3.94                     | 3.17                     | 0.77            | 3.17          |               |
| PhCBZ- <i>mm</i> PS     | -5.62 | -1.18 | 4.43     | 3.85                     | 3.16                     | 0.69            | 3.15          |               |
| PS-PhCBZ- <i>m</i> PS   | -5.64 | -1.26 | 4.38     | 3.85                     | 3.16                     | 0.69            | 3.16          |               |
| PS-PhCBZ- <i>mm</i> PS  | -5.65 | -1.39 | 4.26     | 3.81                     | 3.15                     | 0.66            | 3.15          |               |
| PhCBZ- <i>p</i> PS      | -5.51 | -1.14 | 4.37     | 3.77                     | 3.10                     | 0.67            | 2.97          |               |
| PhCBZ- <i>pp</i> PS     | -5.66 | -1.50 | 4.16     | 3.61                     | 2.98                     | 0.63            | 2.85          |               |
| PS-PhCBZ- <i>pp</i> PS  | -5.70 | -1.59 | 4.11     | 3.56                     | 2.99                     | 0.57            | 2.86          |               |
| PS-PhCBZ                | -5.49 | -1.11 | 4.38     | 3.78                     | 3.18                     | 0.60            | 3.16          |               |
| PS-(PhCBZ) <sub>2</sub> | -5.52 | -1.23 | 4.29     | 3.70                     | 3.17                     | 0.52            | 3.16          |               |
| PS-(PhCBZ) <sub>3</sub> | -5.55 | -1.30 | 4.25     | 3.67                     | 3.17                     | 0.50            | 3.14          |               |

**Table S3** Main transition type and the vertical excitation energy of lowest singlet and triplet states, and other triplet state possessing the same electronic transition with the  $S_1$  based on  $S_0$ -state geometry (energy unit in eV)

| Compounds               | $S_1$ | $T_n$        | Main Transition type    | $T_1$ | Main Transition type        |
|-------------------------|-------|--------------|-------------------------|-------|-----------------------------|
| PhCBZ                   | 4.04  | $T_2 = 3.35$ | HOMO $\rightarrow$ LUMO | 3.18  | HOMO-1 $\rightarrow$ LUMO   |
| PhCBZ- <i>m</i> PS      | 3.94  | $T_2 = 3.36$ | HOMO $\rightarrow$ LUMO | 3.17  | HOMO-3 $\rightarrow$ LUMO   |
| PhCBZ- <i>mm</i> PS     | 3.85  | $T_2 = 3.39$ | HOMO $\rightarrow$ LUMO | 3.16  | HOMO-5 $\rightarrow$ LUMO   |
| PS-PhCBZ                | 3.78  | $T_2 = 3.25$ | HOMO $\rightarrow$ LUMO | 3.18  | HOMO-1 $\rightarrow$ LUMO+2 |
| PS-(PhCBZ) <sub>2</sub> | 3.70  | $T_3 = 3.23$ | HOMO $\rightarrow$ LUMO | 3.17  | HOMO-2 $\rightarrow$ LUMO+4 |
| PS-(PhCBZ) <sub>3</sub> | 3.67  | $T_3 = 3.21$ | HOMO $\rightarrow$ LUMO | 3.17  | HOMO-3 $\rightarrow$ LUMO+6 |
